# Supplementary material for: Water-based nanoparticulate solar cells using a diketopyrrolopyrrole donor polymer
Source: Royal Society of Chemistry journal article supplement (doi:10.1039/c3cp55037k), 2013-12-16
Supplement: c3cp55037k.pdf [file c3cp55037k.pdf]

## Supporting Information

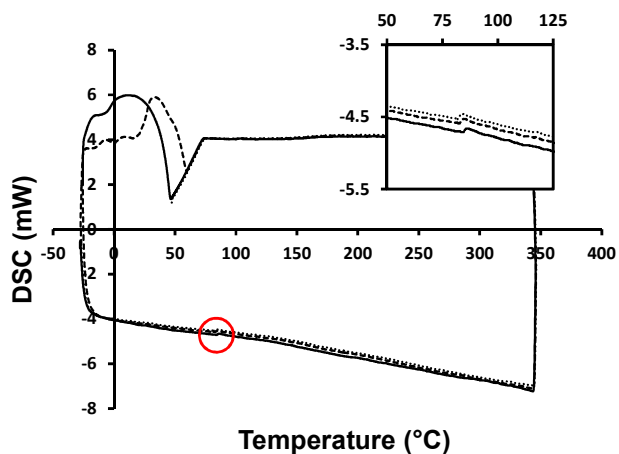

**Figure S1.** DSC trace for pristine PDPP-TNT. Three sequential traces are shown at a temperature transition rate of 10 °C/ min, first trace (solid line), second trace (dashed line) and third trace (dotted line). Features in the upper left of the traces are due to the addition of liquid nitrogen to cool the sample; they are not sample features. The inset highlights the circled T<sub>g</sub> transition at 84.35 °C.

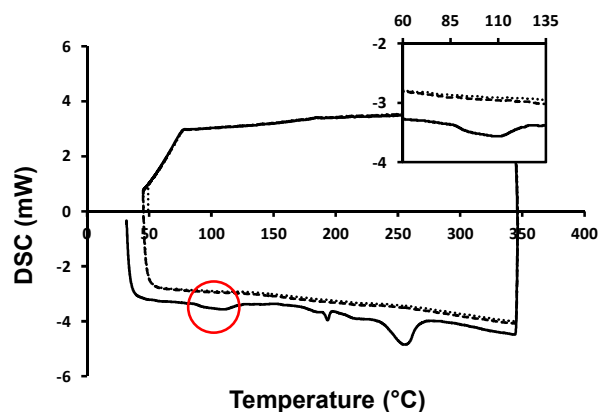

**Figure S2.** DSC trace for 1:2 PDPP-TNT:PC70BM blend nanoparticles. Three sequential traces are shown at a temperature transition rate of 10 °C/ min, first trace (solid line), second trace (dashed line) and third trace (dotted line). Features at ~200 °C and ~250 °C are attributed to PC70BM transitions. The insert highlights the circled  $T_g$  transition at 87.86 °C.
